# Supplementary material
Source: PubMed Central journal article supplement (PMC122774)

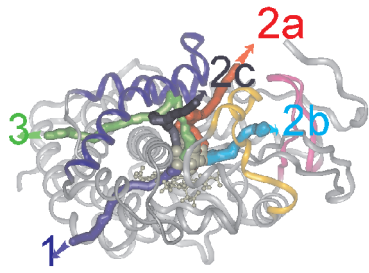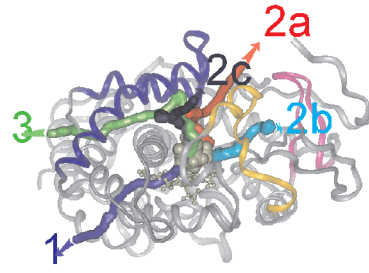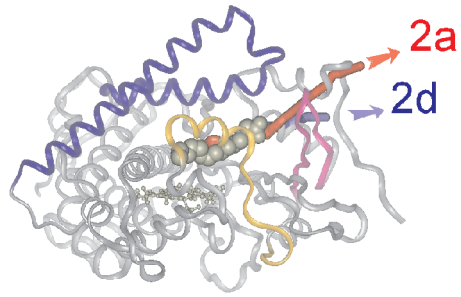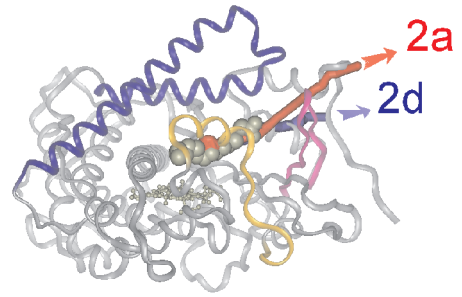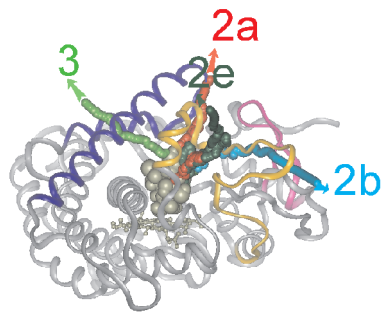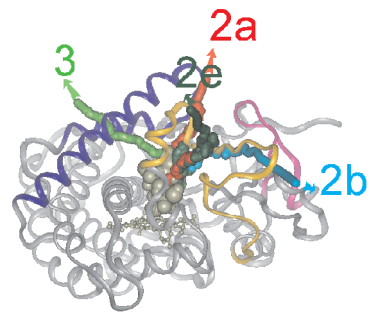

Supplement: pnas_99_8_5361__7.pdf [file pnas_99_8_5361__7.pdf]

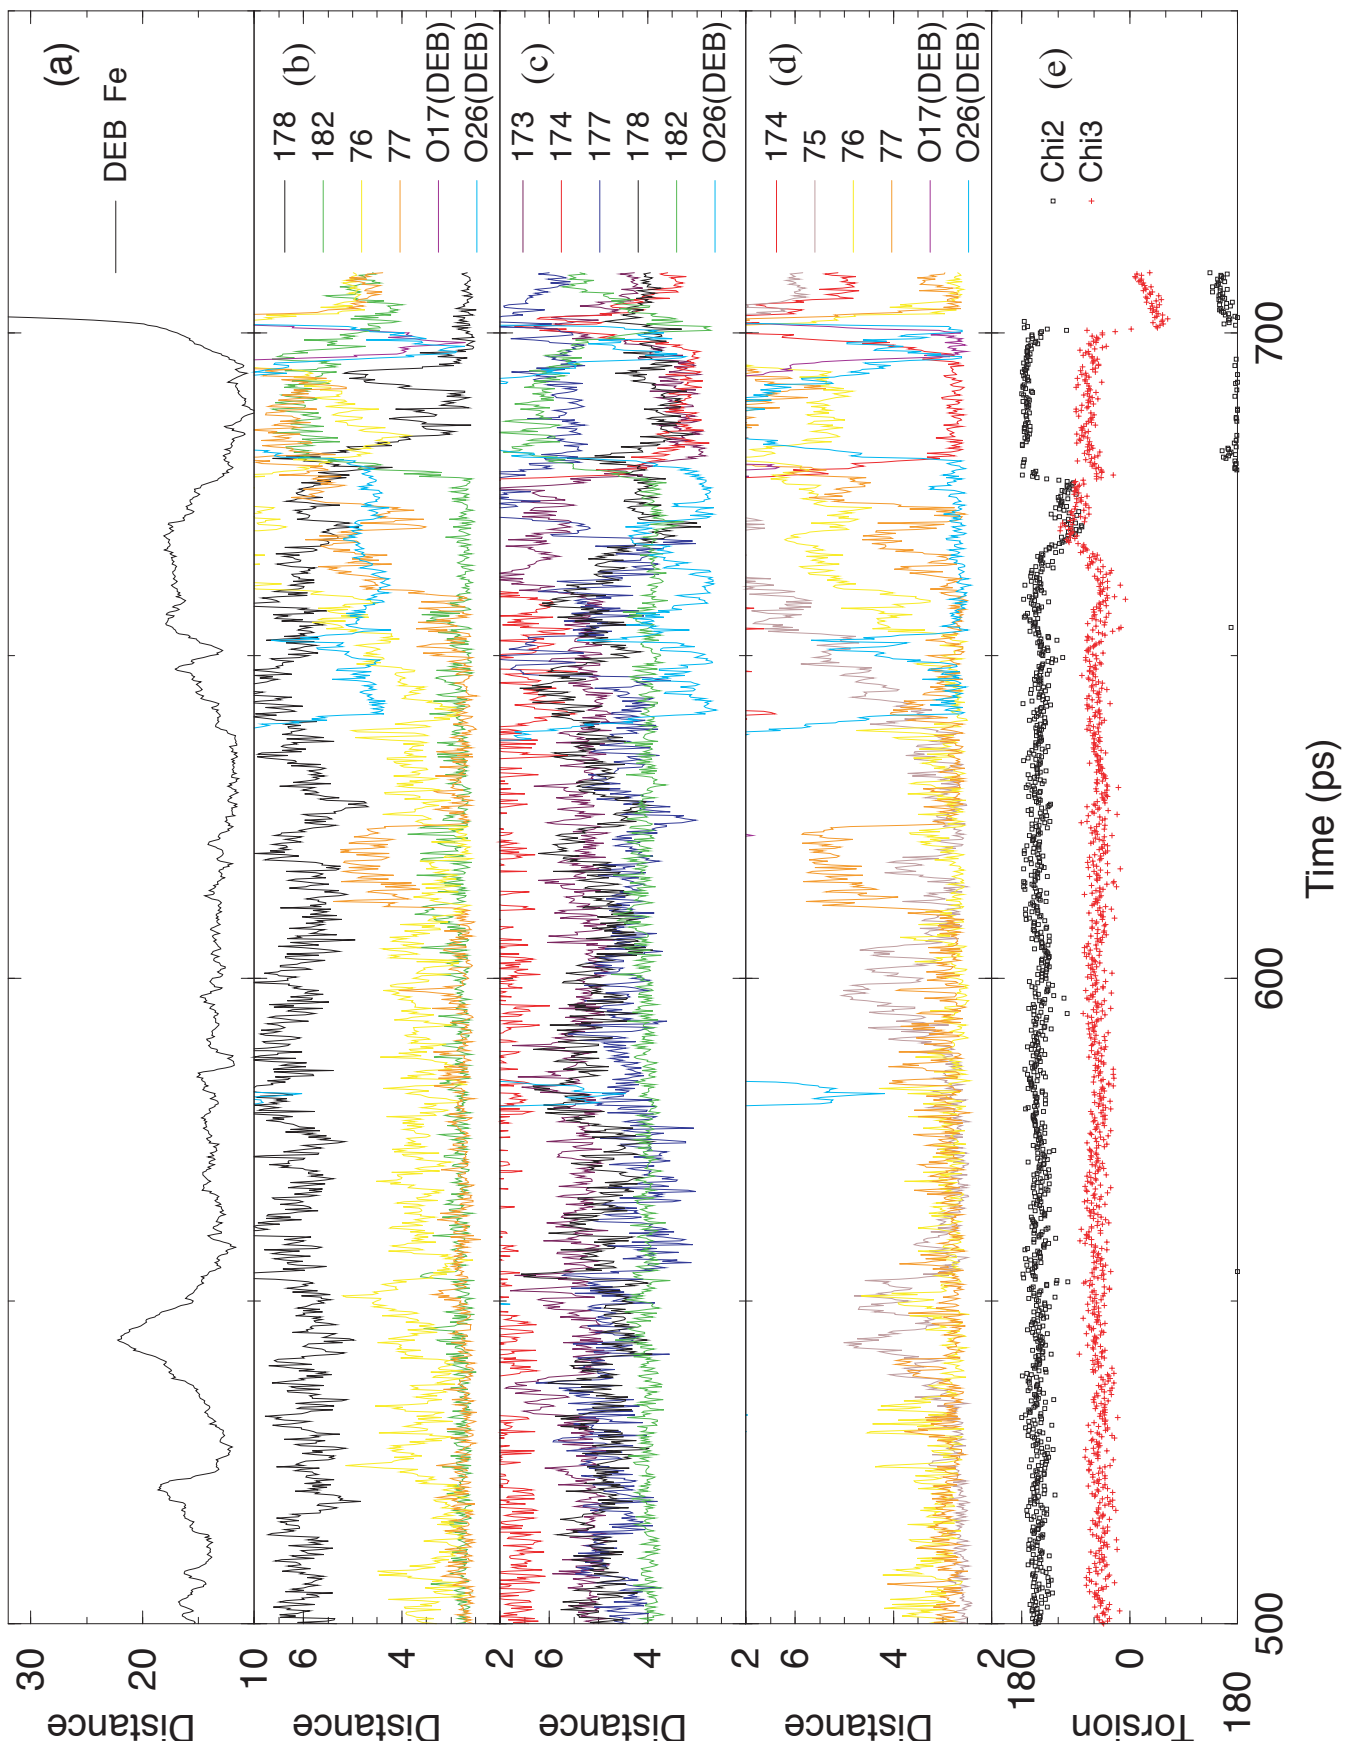

Supplement: pnas_99_8_5361__8.pdf [file pnas_99_8_5361__8.pdf]

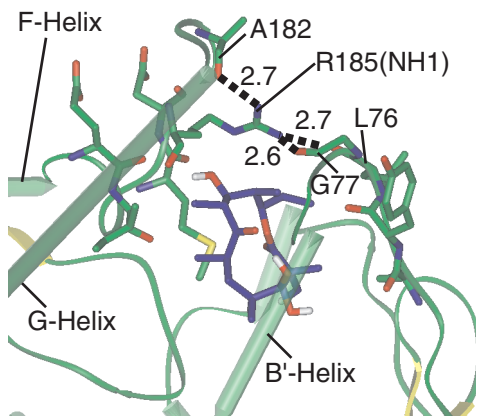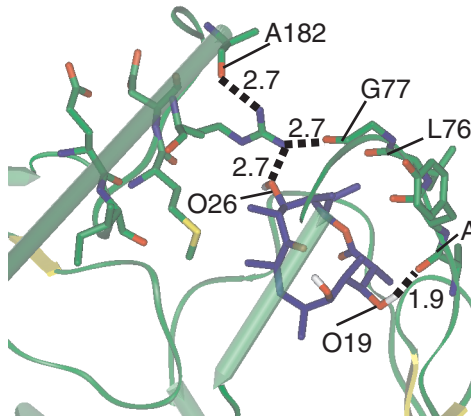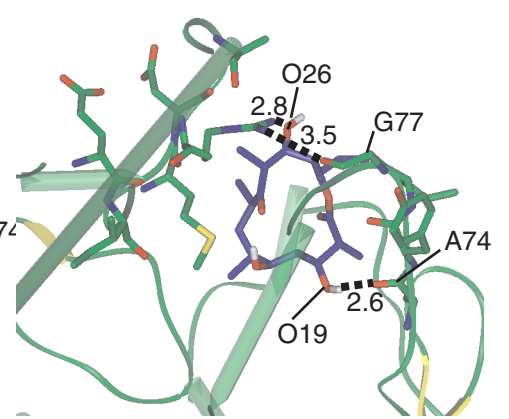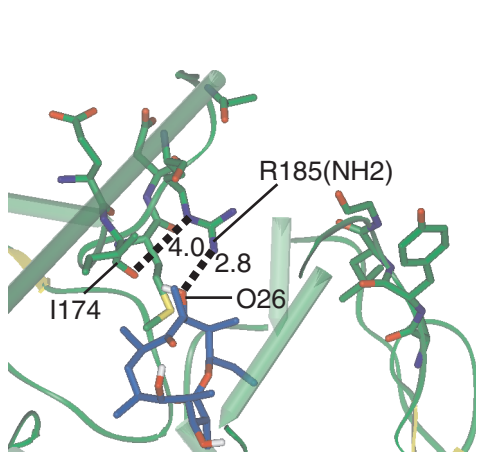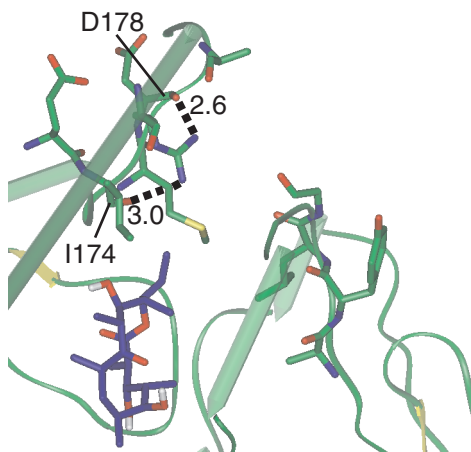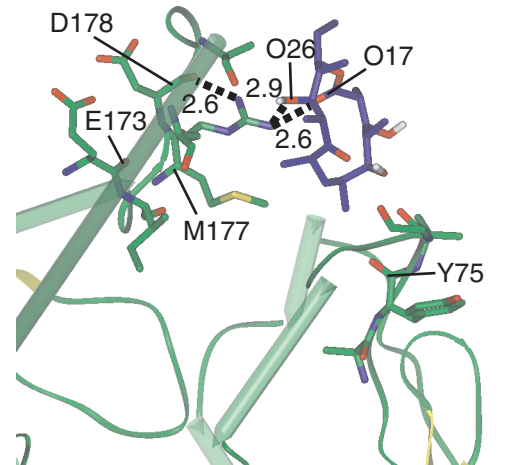

Supplement: pnas_99_8_5361__9.pdf [file pnas_99_8_5361__9.pdf]
